# Supplementary material for: Aerosol impacts on California winter clouds and precipitation during CalWater 2011: local pollution versus long-range transported dust
Source: Copernicus journal article supplement (doi:10.5194/acp-14-81-2014), 2014-01-03
Supplement: Supplementary file 1 [file acp-14-81-2014-supplement.pdf]

## Supplemental Online Materials (SOM)

Here we present another form of Figure 11, in which the dust/IN effects (red lines) are presented based on the LoCCN&NoDust case, meaning the results are for adding the dust layer to a non-dust condition. Therefore, the sign for the dust/IN effects in Figure S1 is opposite to that in Figure 11.

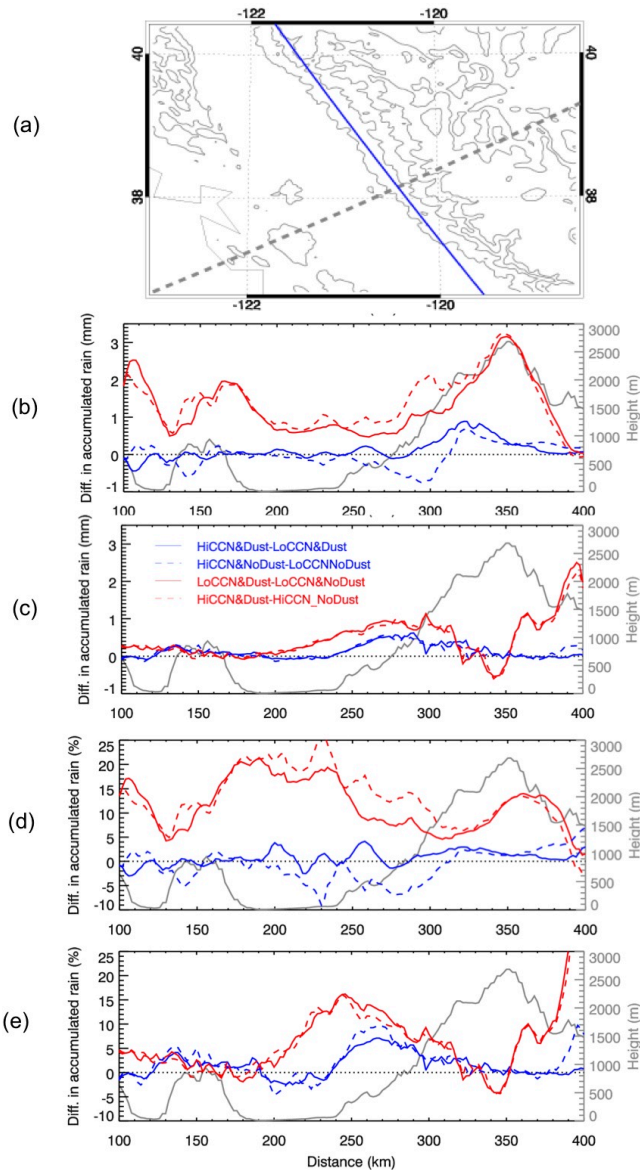

Fig. S1 Same as Figure 11, except the red lines denote dust effects by adding the dust/bio layer under the low CCN (solid; LoCCN&Dust-LoCCN&NoDust) and high CCN (dashed; HiCCN&Dust-HiCCN&NoDust) conditions.
